# Supplementary material for: Thermo-catalytic decomposition of cotton seed press cake over nickel doped zeolite Y, hydrogen: enhanced yield of bio-oil with highly selective fuel-range hydrocarbons
Source: Royal Society of Chemistry journal article supplement (doi:10.1039/d4ra06163b), 2024-01-01
Supplement: d4ra06163b1.pdf [file d4ra06163b1.pdf]

## Supporting Information

**Table S1.** Calculation of Mean, Variance and Standard deviation of product yields at optimum temperature

| Product yield (%) |         | Readings |    |      | Mean  | Variance | Standard Deviation |
|-------------------|---------|----------|----|------|-------|----------|--------------------|
|                   |         | A        | B  | C    |       |          |                    |
| 1.                | Bio-oil | 24.5     | 35 | 31   | 30.17 | 18.72    | 4.33               |
| 2.                | Gas     | 15       | 17 | 27.4 | 19.80 | 29.55    | 5.44               |
| 3.                | Char    | 60.5     | 48 | 41.6 | 50.03 | 61.60    | 7.85               |

**Table S2.** Calculation of Mean, Variance and Standard deviation of product yields at optimum time

| Product yield (%) |         | Readings |    |      | Mean  | Variance | Standard Deviation |
|-------------------|---------|----------|----|------|-------|----------|--------------------|
|                   |         | A        | B  | C    |       |          |                    |
| 1.                | Bio-oil | 23.2     | 35 | 30.3 | 29.50 | 23.53    | 4.85               |
| 2.                | Gas     | 15.3     | 17 | 20.1 | 17.47 | 3.95     | 1.99               |
| 3.                | Char    | 61.5     | 48 | 49.6 | 53.03 | 36.27    | 6.02               |

**Table S3.** Calculation of Mean, Variance and Standard deviation of product yields at optimum Catalyst concentration

| Product yield (%) |         | Readings |    |    | Mean  | Variance | Standard Deviation |
|-------------------|---------|----------|----|----|-------|----------|--------------------|
|                   |         | A        | B  | C  |       |          |                    |
| 1.                | Bio-oil | 28       | 35 | 31 | 31.33 | 8.22     | 2.87               |
| 2.                | Gas     | 32       | 17 | 38 | 29    | 78       | 8.83               |
| 3.                | Char    | 40       | 48 | 31 | 39.67 | 48.22    | 6.94               |

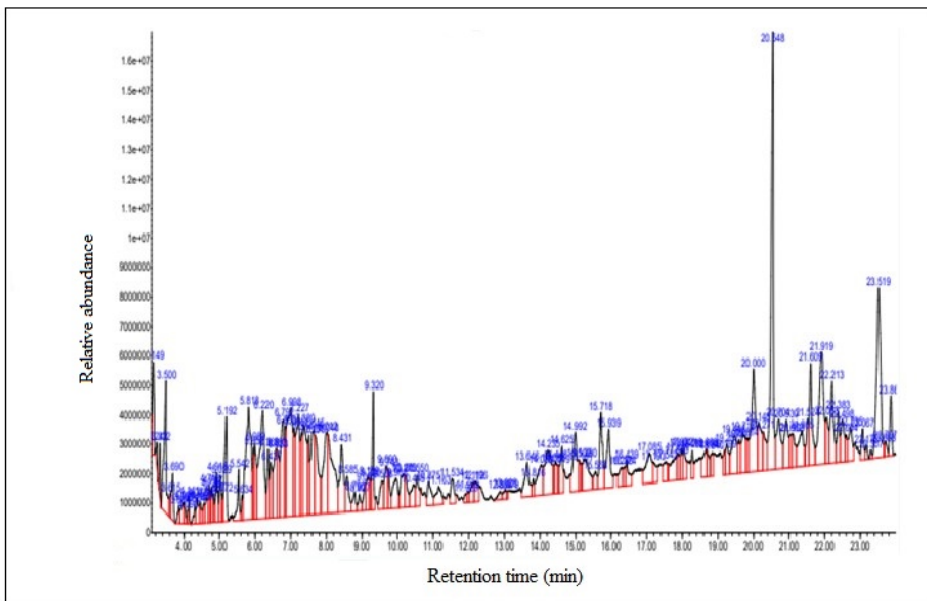

**Figure S1:** GC-MS of oil obtained from thermocatalytic reaction of cotton seed press cake
